# Supplementary material
Source: publisher site journal article supplement (https://www.dovepress.com/article/608648)
Supplement: Supplementary file 1 [file Supplementary%20File.docx]

**Supplementary File 1:**

**Web of Science database search formula**

TS = (“liposome*” OR “Lipid based nano*”) AND TS=(“liver cancer” OR “hepatocellular carcinoma” OR “hepatic cancer” OR “HCC” OR “primary hepatic cancer” OR “primary liver cancer” OR “malignant hepatoma” OR “primary liver carcinoma” OR “hepatic neoplas*” OR “liver neoplas*” OR “hepatic tumor*” OR “liver tumor*”)

**PubMed database search formula**

("liposome*"[Title/Abstract] OR "Lipid based nano*"[Title/Abstract]) AND ("liver cancer"[Title/Abstract] OR "hepatocellular carcinoma"[Title/Abstract] OR "hepatic cancer"[Title/Abstract] OR "HCC"[Title/Abstract] OR "primary hepatic cancer"[Title/Abstract] OR "primary liver cancer"[Title/Abstract] OR "malignant hepatoma"[Title/Abstract] OR "primary liver carcinoma"[Title/Abstract] OR "hepatic neoplas*"[Title/Abstract] OR "liver neoplas*"[Title/Abstract] OR "hepatic tumor*"[Title/Abstract] OR "liver tumor*"[Title/Abstract])

**Supplementary File 2: The top 10 most co-cited references.**

| **Rank** | **First author** | **Year** | **Journal** | **Title** | **Citations** | **References** |
| --- | --- | --- | --- | --- | --- | --- |
| 1 | Hui Ling | 2013 | Nature Reviews Drug Discovery | MicroRNAs and other non-coding RNAs as targets for anticancer drug development | 1235 |  |
| 2 | Carlee E. Ashley | 2011 | Nature Materials | The targeted delivery of multicomponent cargos to cancer cells by nanoporous particle-supported lipid bilayers | 894 |  |
| 3 | Rolf F. Barth | 2005 | Clin Cancer Res | Boron Neutron Capture Therapy of Cancer: Current Status and Future Prospects | 894 |  |
| 4 | Tatsuhiro Ishida | 2008 | International Journal of Pharmaceutics | Accelerated blood clearance (ABC) phenomenon upon repeated injection of PEGylated liposomes | 391 |  |
| 5 | Prajna Mishra | 2016 | Asian Journal of Pharmaceutical Sciences | PEGylation in anti-cancer therapy: An overview | 329 |  |
| 6 | Tianyue Jiang | 2012 | Biomaterials | Dual-functional liposomes based on pH-responsive cell-penetrating peptide and hyaluronic acid for tumor-targeted anticancer drug delivery | 319 |  |
| 7 | Feng T | 2017 | International Journal of Nanomedicine | Liposomal curcumin and its application in cancer | 302 |  |
| 8 | Jin Hee Maeng | 2010 | Biomaterials | Multifunctional doxorubicin loaded superparamagnetic iron oxide nanoparticles for chemotherapy and magnetic resonance imaging in liver cancer | 279 |  |
| 9 | Zhenghong Xu | 2009 | Biomaterials | The performance of docetaxel-loaded solid lipid nanoparticles targeted to hepatocellular carcinoma | 270 |  |
| 10 | Sebastien Taurin | 2012 | Journal of Controlled Release | Anticancer nanomedicine and tumor vascular permeability; Where is the missing link? | 270 |  |

**Supplementary File 3: Clinical Trials on liposome-based therapy for hepatocellular carcinoma.**

| **Rank** | **First author** | **Year** | **Journal** | **Title** | **References** |
| --- | --- | --- | --- | --- | --- |
| **1** | S Nahum Goldberg | 2002 | AJR Am J Roentgenol | Radiofrequency ablation of hepatic tumors: increased tumor destruction with adjuvant liposomal doxorubicin therapy |  |
| **2** | Huali Wu | 2012 | J Clin Pharmacol | Population pharmacokinetics of pegylated liposomal CKD-602 (S-CKD602) in patients with advanced malignancies |  |
| **3** | Won Young Tak | 2018 | Clin Cancer Res | Phase III HEAT Study Adding Lyso-Thermosensitive Liposomal Doxorubicin to Radiofrequency Ablation in Patients with Unresectable Hepatocellular Carcinoma Lesions |  |
| **4** | Michael D Gray | 2019 | Radiology | Focused Ultrasound Hyperthermia for Targeted Drug Release from Thermosensitive Liposomes: Results from a Phase I Trial |  |
| **5** | [Wei Yang](https://pubmed.ncbi.nlm.nih.gov/?sort=date&term=Yang+W&cauthor_id=31436231) | 2019 | J Cancer Res Ther | Thermosensitive liposomal doxorubicin plus radiofrequency ablation increased tumor destruction and improved survival in patients with medium and large hepatocellular carcinoma: A randomized, double-blinded, dummy-controlled clinical trial in a single center |  |
